# Supplementary material for: Eradication of Mature Bacterial Biofilms with Concurrent Improvement in Chronic Wound Healing Using Silver Nanoparticle Hydrogel Treatment
Source: MDPI journal article supplement (doi:10.3390/biomedicines9091182), 2021-09-08
Supplement: s1 [file s1]

## Supplementary Materials

# **Eradication of Mature Bacterial Biofilms with Concurrent Improvement in Chronic Wound Healing Using Silver Nanoparticle Hydrogel Treatment**

*Hanif Haidari<sup>a, b</sup>, Richard Bright<sup>c</sup>, Sanjay Garg<sup>a</sup>, Krasimir Vasilev<sup>c, b \*</sup>, Allison J. Cowin<sup>b, a \*</sup>,  
and Zlatko Kopecki<sup>b, a \*</sup>*

<sup>a</sup>Clinical & Health Sciences, University of South Australia, Adelaide, SA 5000, Australia

<sup>b</sup>Future Industries Institute, University of South Australia, Mawson Lakes, SA 5095, Australia

<sup>c</sup>Academic Unit of STEM, University of South Australia, Mawson Lakes, SA 5095, Australia

**Keywords:** Wound infection, antibiofilm hydrogel, AgNP hydrogel, stimuli responsive hydrogel, wound healing, controlled release, and wound biofilm eradication, mature biofilm.

**Table S1:** Pluronic F-127 hydrogel formulation composition

| Ingredients                   | % W/W    |
|-------------------------------|----------|
| Pluronic F- 127               | 19       |
| Propylene glycol              | 10       |
| Silver nanoparticles solution | 200 µg/g |
| MilliQ water                  | 71       |

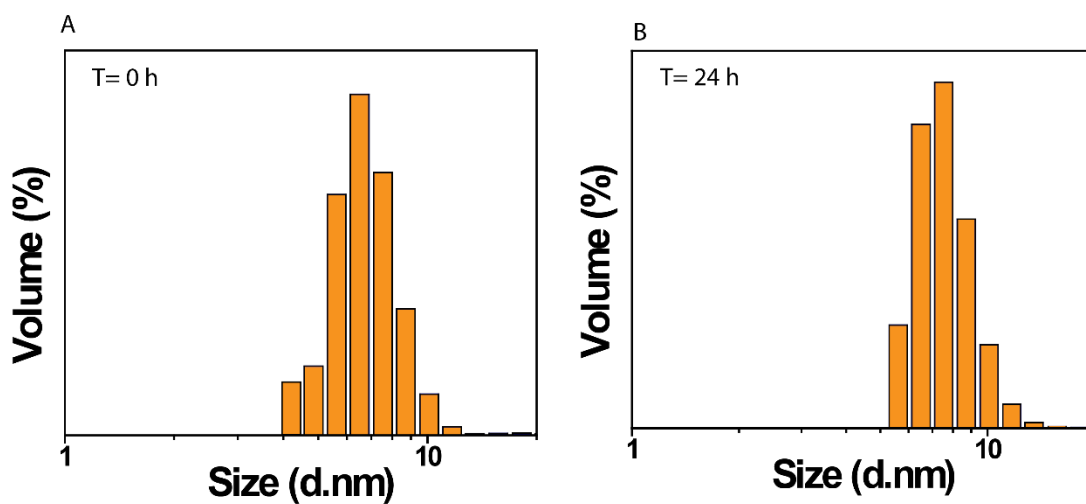

**Figure S1.** Dynamic light scattering (DLS) size distribution of AgNP hydrogel is measured as volume (%). (a,b) Mean hydrodynamic diameter of AgNP hydrogel in DMEM (10% FCS) at t= 0. and t=24 at 37°C storage.

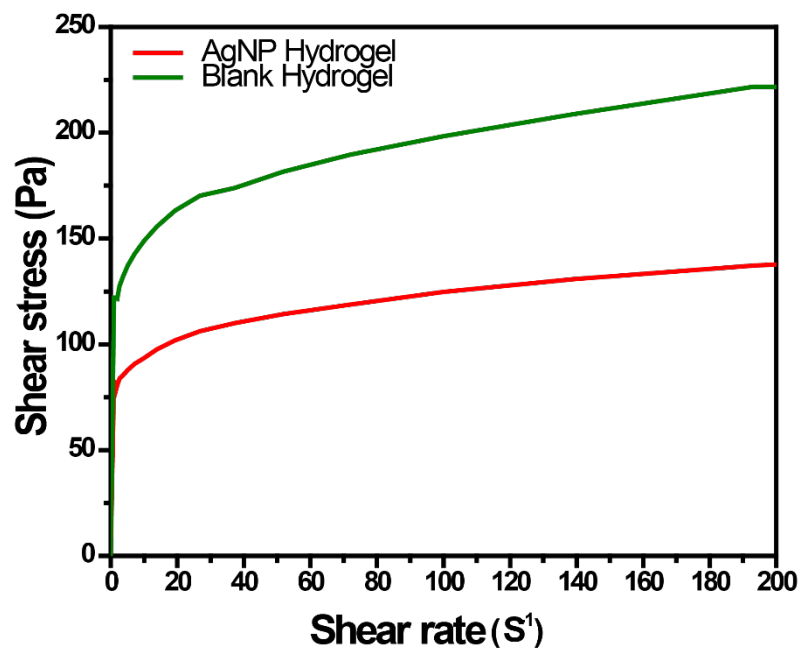

**Figure S2.** Measurement of shear stress in response to shear rate of pluronic f-127 hydrogel at ambient temperature.

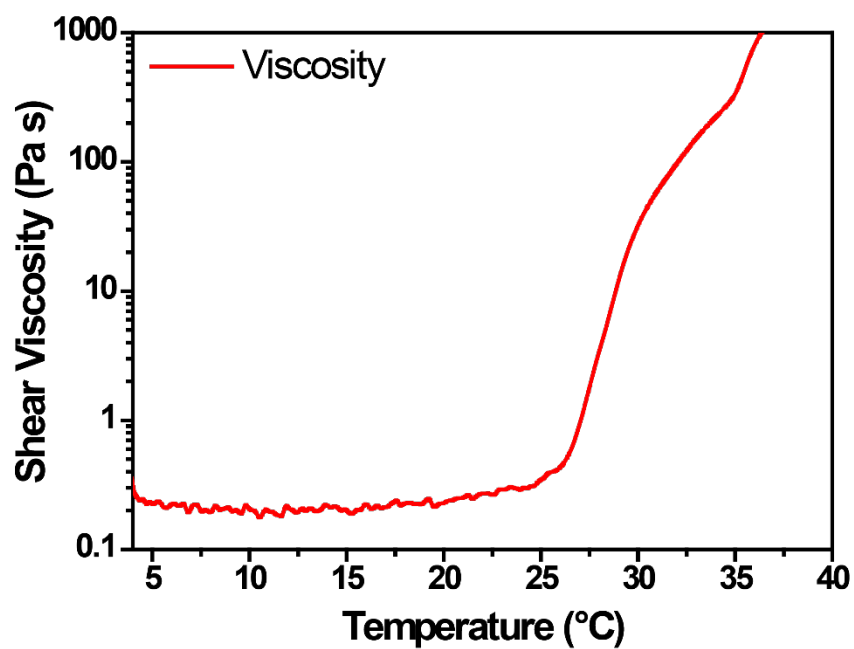

**Figure S3.** Measurement of shear stress in response to shear rate of pluronic f-127 hydrogel at ambient temperature.

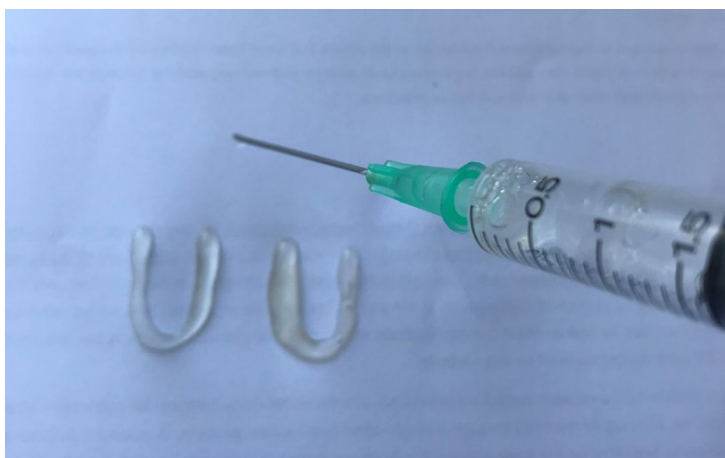

**Figure S4.** Photograph of AgNP hydrogel delivered using a syringe demonstrating ease of application and excellent hydrogel viscoelastic properties.

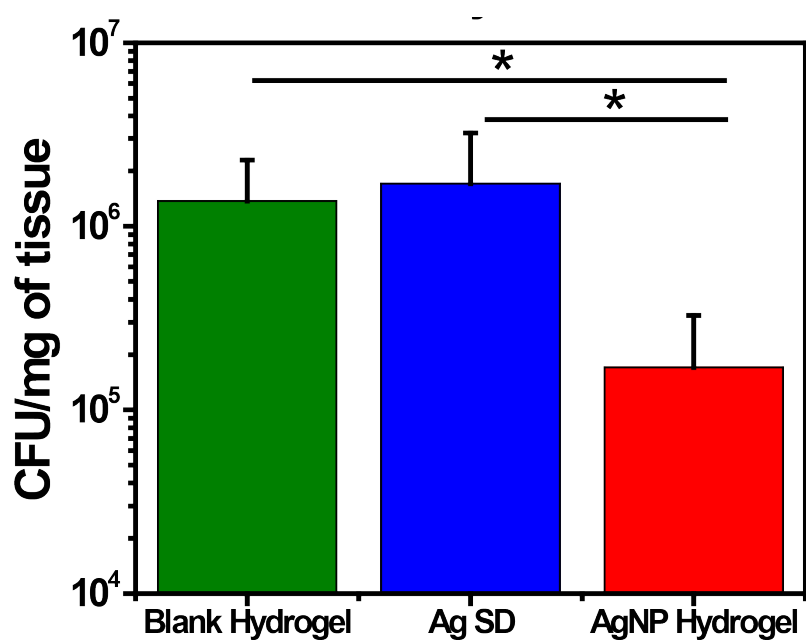

**Figure S5.** CFU counts of residual bacteria within wound tissue after 10 days of treatment. Data are shown as mean  $\pm$ SD and the \* denotes significant difference using one-way ANOVA followed by Dunnett's multiple comparison test. \*P < 0.05, n=8.
